# Supplementary material for: Immune microenvironment modulation unmasks therapeutic benefit of radiotherapy and checkpoint inhibition
Source: PubMed Central journal article supplement (PMC6693252; doi:10.1186/s40425-019-0698-6), 2019-08-13

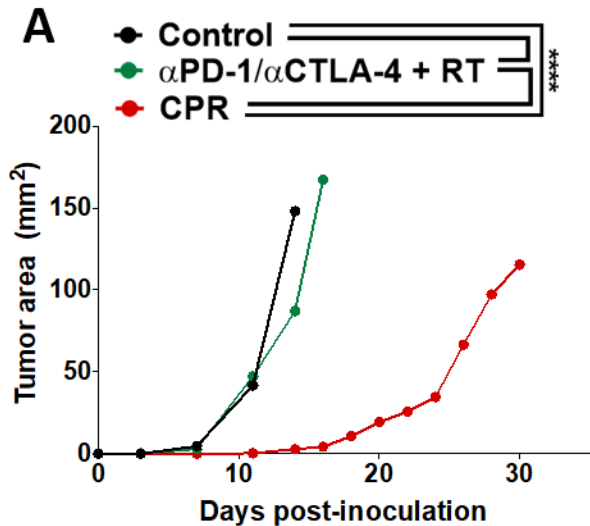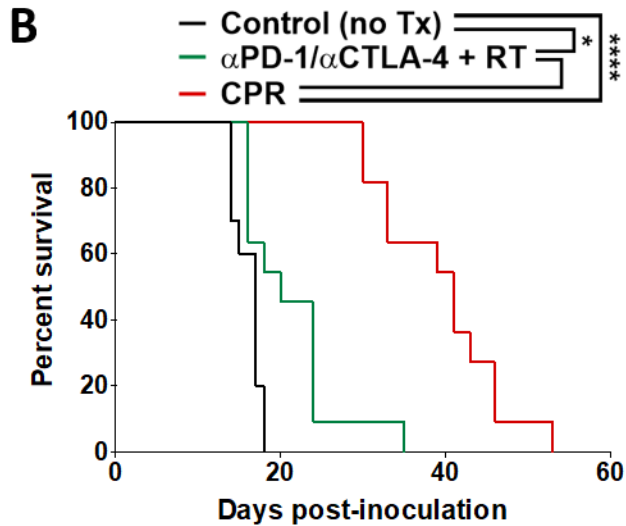

Supplement: 40425_2019_698_MOESM4_ESM.pdf [file 40425_2019_698_MOESM4_ESM.pdf]
